# Supplementary material for: Mark-Release-Recapture Trial with <em>Aedes albopictus</em> (Diptera, Culicidae) Irradiated Males and the Influence of Climatic Factors
Source: Preprints.org preprint supplement (doi:10.20944/preprints202407.2050.v1), 2024-07-26
Supplement: Supplementary file 1 [file supplementary]

**Supplementary Table S1:** Association between marking colours and distance and capture

|  | OR | 95% CI | p-value |
| --- | --- | --- | --- |
| Blue | | | |
| Distance | 1.04 | 0.72, 1.50 | 0.83 |
| Capture | 1.06 | 0.97, 1.15 | 0.20 |
| Orange | | | |
| Distance | 1.03 | 0.70, 1.52 | 0.89 |
| Capture | 1.04 | 0.95, 1.14 | 0.35 |
| Pink | | | |
| Distance | 1.08 | 0.75, 1.56 | 0.67 |
| Capture | **1.09** | **1.01, 1.18** | **0.03** |
| Red | | | |
| Distance | 1.08 | 0.75, 1.55 | 0.69 |
| Capture | **1.09** | **1.01, 1.18** | **0.04** |
| Yellow | | | |
| Distance | 1.07 | 0.74, 1.55 | 0.71 |
| Capture | **1.10** | **1.02, 1.19** | **0.02** |

OR: odds-ratio, CI: confidence interval. Significant values are displayed in bold.

**Supplementary Table S2:** Summary of the climatic conditions during human landing collection.

| Variable | Statistics1 |
| --- | --- |
| Temperature | 21.95 (1.04) |
| Wind intensity (in km) | 12.4 (4.9) |
| Wind intensity categorised (in km) |  |
| Weak | 560 (63.5%) |
| Moderate | 322 (36.5%) |
| Wind direction |  |
| --- | 0 (0.0%) |
| N | 12 (1.4%) |
| NE | 0 (0.0%) |
| E | 120 (13.6%) |
| SE | 238 (27%) |
| S | 12 (1.4%) |
| SW | 238 (27%) |
| W | 230 (26.1%) |
| NW | 32 (3.6%) |
| Cumulative precipitation categorised |  |
| None | 34 (3.9%) |
| Precipitation | 848 (96.1%) |
| Humidity (%) | 81 (10) |

1 For continuous variables the mean and standard deviation is presented and for categorical variables, the absolute and relative frequency.

**Supplementary Table S3:** Association between release rounds and climatic conditions.

|  | OR | 95% CI | p-value |
| --- | --- | --- | --- |
| First round | | | |
| Wind intensity (ref. weak) | **0.00** | **0.00, 0.01** | **<0.001** |
| Temperature (centered at the mean) | 1.70 | 0.93, 3.10 | 0.086 |
| Humidity (centered at the mean) | **0.81** | **0.77, 0.86** | **<0.001** |
| Precipitation (ref. none) | **0.00** | **0.00, 15,111,808,362** | **0.7** |
| Third round | | | |
| Wind intensity (ref. weak) | **0.01** | **0.00, 0.01** | **<0.001** |
| Temperature (centered at the mean) | **5.20** | **2.81, 9.63** | **<0.001** |
| Humidity (centered at the mean) | 0.96 | 0.91, 1.02 | 0.2 |
| Precipitation (ref. none) | **22.7** | **3.93, 131** | **<0.001** |

OR: odds-ratio, CI: confidence interval. Significant values are displayed in bold.
